# Supplementary material for: Can a Diels–Alder reaction be accelerated in a supersaturated solvent at room temperature?
Source: Royal Society of Chemistry journal article supplement (doi:10.1039/c6nj01912a), 2016-01-01
Supplement: c6nj01912a1.pdf [file c6nj01912a1.pdf]

## Electronic Supporting Information

### Can a Diels-Alder Reaction Accelerate in a Supersaturated Solvent at Room Temperature?

Amit S Nagare<sup>§</sup>, Arpan Manna<sup>§</sup> and Anil Kumar\*

#### 1. The detailed GC method:

The following parameters were set for a typical kinetic analysis for Scheme 1

Column make: CP SIL 5CB

Column length: 15m

Internal diameter: 0.25 mm

Film thickness: 0.25-micron

Flow rate: 0.8 ml/min of nitrogen

Injector temperature: 200 °C

Detector temperature: 250 °C.

Total run time 18.51 min (Hold at 70 °C for 5 min., ramp at 4°C, then maintain at 100 °C for 0 min., ramp at 79 °C and then maintain at 180 °C for 5 min.)

Internal Standard (IS): Chlorobenzene

Typical Retention Times of the compounds analyzed:

Compound Retention time (min)

| Compound | Time (min) |
|----------|------------|
| IS       | 3.48       |
| 3(a)     | 15.95      |
| 3(b)     | 16.02      |

The GC method was calibrated with respect to the product concentrations using pure samples of the products. The amount of product formed as a function of time gave the extent of the reaction (x).

From the gas chromatographic analysis the extent of the reaction ( $x$ ) can be monitored by plotting the amount of product as a function of time. Since for the reaction (Scheme 1), products have been formed due to reactions between the two reactants in 1:1 ratio; the concentration of the remaining reactants would be equal with respect to time. It implies that if 'a' is initial concentration of both the reactants [1M of each of **1** and **2** have been used in the case of Scheme 1]. Now  $(a-x)$  will give the remaining reactants in the solvent at time 't' after commencing the reaction at  $t=0$ . The plot between  $x/a(a-x)$  vs.  $t$  gives the value of  $k_2$  in each case.

## 2. Determination of second order rate constant:

The determination of  $k_2$  was done according to the standard kinetic procedure, when initial concentrations of the reactants are same. The expression to determine  $k_2 = (1/at) \times [x/(a-x)]$ , where a plot between  $x/(a-x)$  and  $t$ . For example, The  $k_2$  value was determined from the slope of the graph as  $k_2 = 5.61 \times 10^{-5} \text{ M}^{-1}\text{s}^{-1}$  ( $r^2 = 0.991$ ).

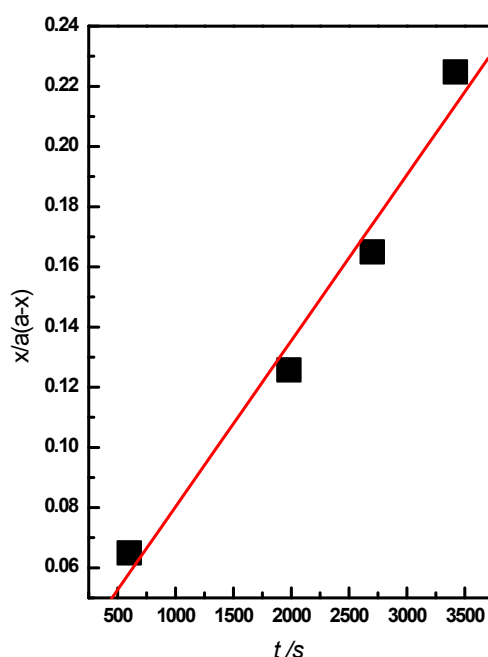

**Figure S1:** Plot of  $[x/(a(a-x))]$  against time,  $t$  for the reaction of **1** with **2** in Honey at 298.15 K.

## 3. Preparation of New supersaturated solvent

A. New supersaturated solvent (with gluconic acid) has been prepared by using percentage composition described in Table 1. For the preparation of 10 g of artificial honey, we have taken 1.81 g of water, 3.89 g of fructose, 3.182 g of glucose, 0.144 g of sucrose, 0.81g of maltose, 0.127g of gluconic acid, 0.037 g of gluconolactone in sealed tube (M/s. Sigma Aldrich Co.). It

was already made sure that all carbohydrate added to sealed tube are dried under vacuum for ~6 h prior to their use. Then the mixture of carbohydrate is heated at temperature 120 °C under vigorous stirring for 4 h.

B. New supersaturated solvent (without gluconic acid ) has been prepared by using percentage composition described in Table 1. For the preparation of 10 g of artificial honey, we have taken 1.81 g of water, 3.89 g of fructose, 3.309 g of glucose, 0.144 g of sucrose, 0.81g of maltose, 0.037 g of gluconolactone in sealed tube (M/s. Sigma Aldrich Co.). It was already made sure that all carbohydrate added to sealed tube are dried under vacuum for ~6 h prior to their use. Then the mixture of carbohydrate is heated at temperature 120 °C under vigorous stirring for 4 h.

C. For the preparation of saturated solution of glucose first 6.9 g of glucose was added to 10 g of water in a sealed tube and then the mixture was heated at 120 °C under vigorous stirring for ~4 h. Supersaturated solution of glucose was prepared by the addition of 7.5 g of glucose in to 10 g of water and consequent heating at 130 °C under vigorous stirring for ~4 h. Similarly, saturated solution of fructose has been prepared by addition of 38 gm of fructose in to 10 g of water in sealed tube followed by heating at 120 °C under vigorous stirring for ~4 h. Supersaturated solution of fructose was made by addition of 40 g of fructose to 10 g of water in sealed tube followed by heating at 130 °C under vigorous stirring for ~4 h.

#### 4. Measurement of $E_N^T$ polarity parameter

$E_N^T$  values of the solvent medium in question were measured via the standard solvatochromic methods.<sup>1</sup> For the measurement of  $E_N^T$  parameter of Honey, Reichardt's dye no. 30 (**Figure S2**), is used as a probe molecule. The minute amount of Reichardt's dye no. 30 was added to Honey at 40 °C with vigorous stirring. Samples containing probe molecules was then transferred to the cuvette for the measurement of  $\lambda_{\max}$  (in nm). A representative spectra obtained is shown in **Figure S3**.

Temperature of the sample was kept constant at 298.15 K using the Peltier setup with an accuracy of  $\pm 0.01$  K.  $E_T(30)$  value for the Honey were calculated from the molar transition energy (in kcal mol<sup>-1</sup>) of Reichardt's dye using equation (1).

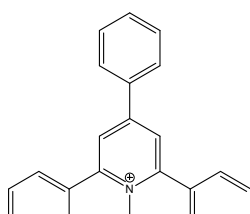

**Figure S2.** Structures of Reichardt's dye no. 30.

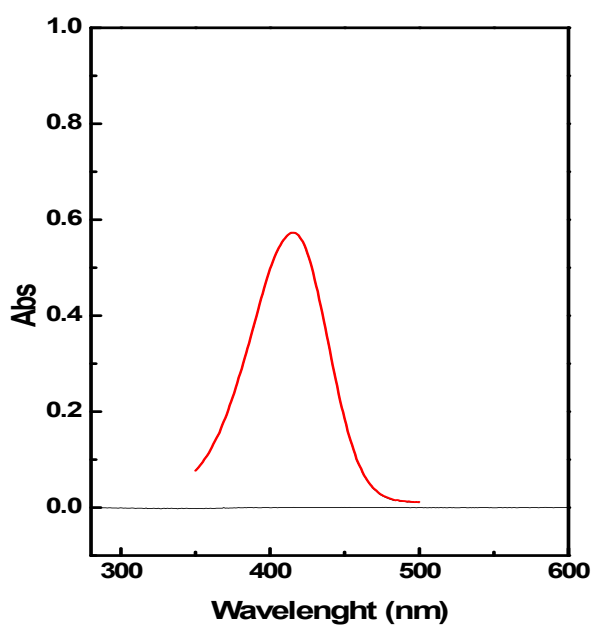

**Figure S3:** A representative UV-vis spectra obtained.

$$E_T(30) = hc \nu_{\max}(30)N_A = 28591/\lambda_{\max} \quad (1)$$

The  $E_N^T$  values of Honey was calculated via the normalization of  $E_T(30)$  parameter, using water ( $E_N^T = 1$ ) and TMS ( $E_N^T = 0$ ) as reference solvents.

$$\begin{aligned} E_N^T &= [E_T(30)_{\text{solvent}} - E_T(30)_{\text{TMS}}] / [E_T(30)_{\text{water}} - E_T(30)_{\text{TMS}}] \\ &= [E_T(\text{solvent}) - 30.7] / 32.4 \end{aligned} \quad (2)$$

## 5. $^1\text{H}$ -NMR spectra:

The  $^1\text{H}$ -NMR spectra of the product of the reaction of cyclopentadiene (**1**) with methyl acrylate (**2**): Methyl bicyclo[2.2.1] hept-5-ene-2-carboxylate (**3a, b**)  $^1\text{H}$ -NMR (200 MHz,  $\text{CDCl}_3$ ).

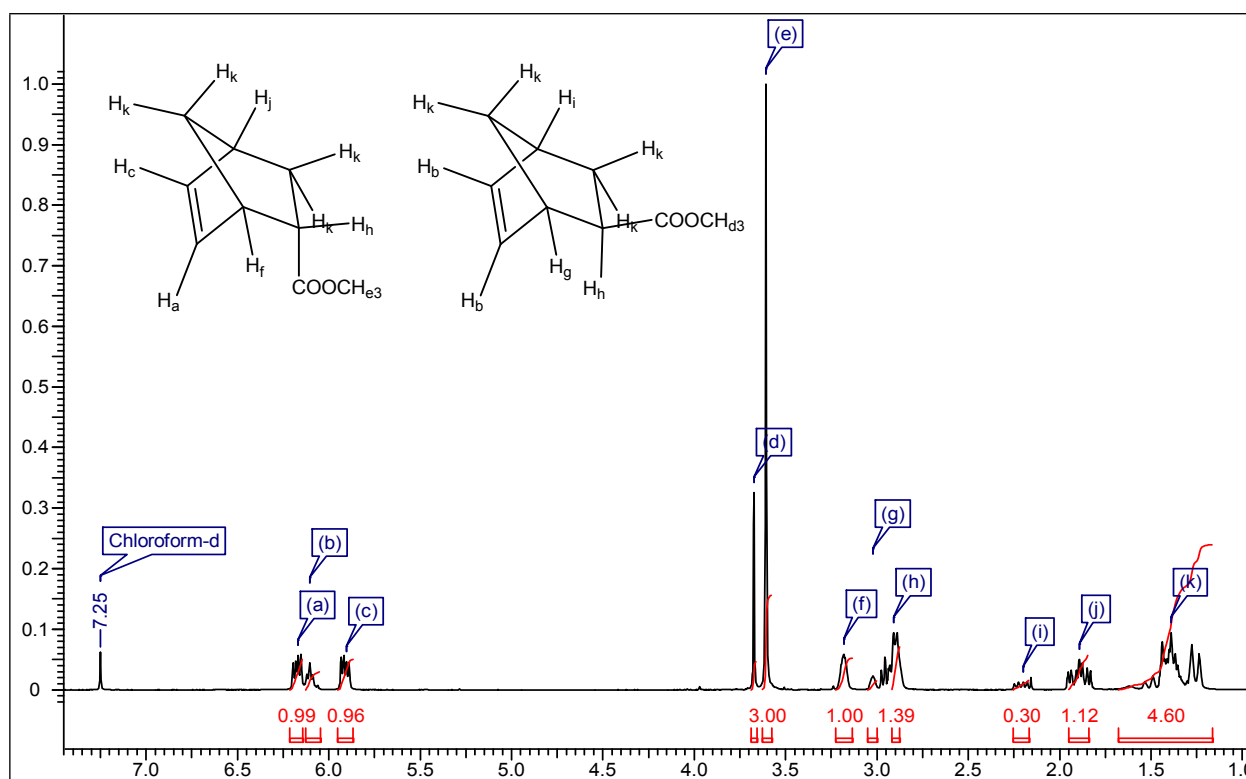

## 6. Comparative IR- spectra of unsaturated, saturated and supersaturated aqueous solution of fructose.

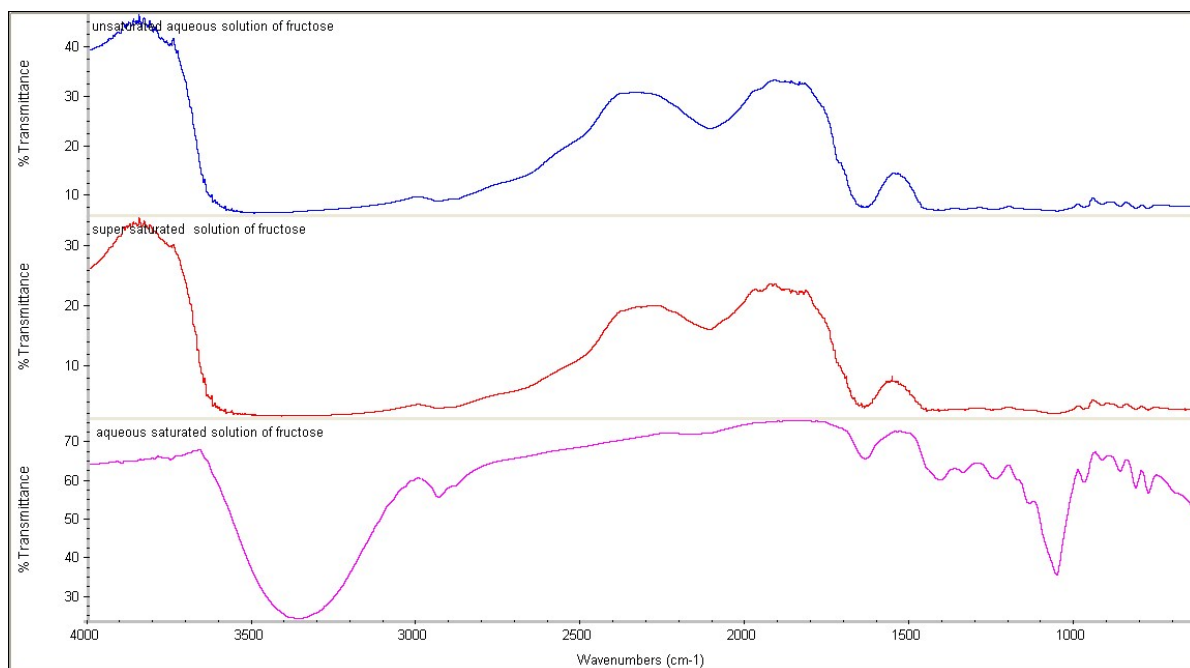

**Figure S4.** Superimposed FTIR spectra *i.e.*, % Transmittance *vs.* wavelength (cm<sup>-1</sup>) plots of the aqueous solution of fructose. Here the pink (saturated solution), red (Super saturated solution) and blue (unsaturated solution) give a comparative look.

7. The Arrhenius plots of supersaturated solvent and Carbohydrate-urea melt.

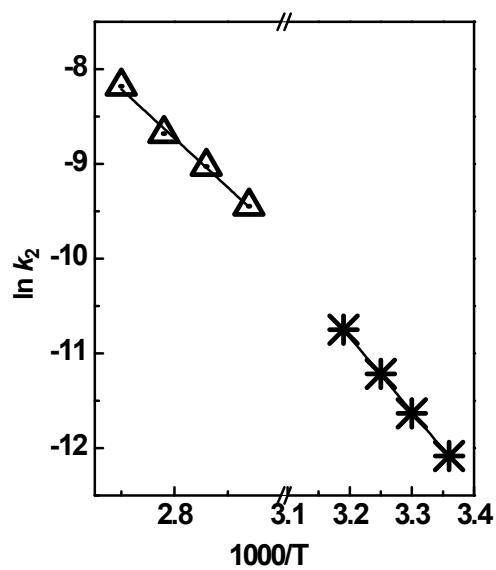

**Figure S5.** The Arrhenius plots for reaction between **1** and **2** in the presence of new supersaturated solvent (\*) and glucose–DMU (*N, N* Dimethyl Urea) mixture ( $\Delta$ )

8.  $^1\text{H}$  NMR of the super-saturated solution used ( $\text{DMSO-d}^6$  solvent) at 500 MHz:

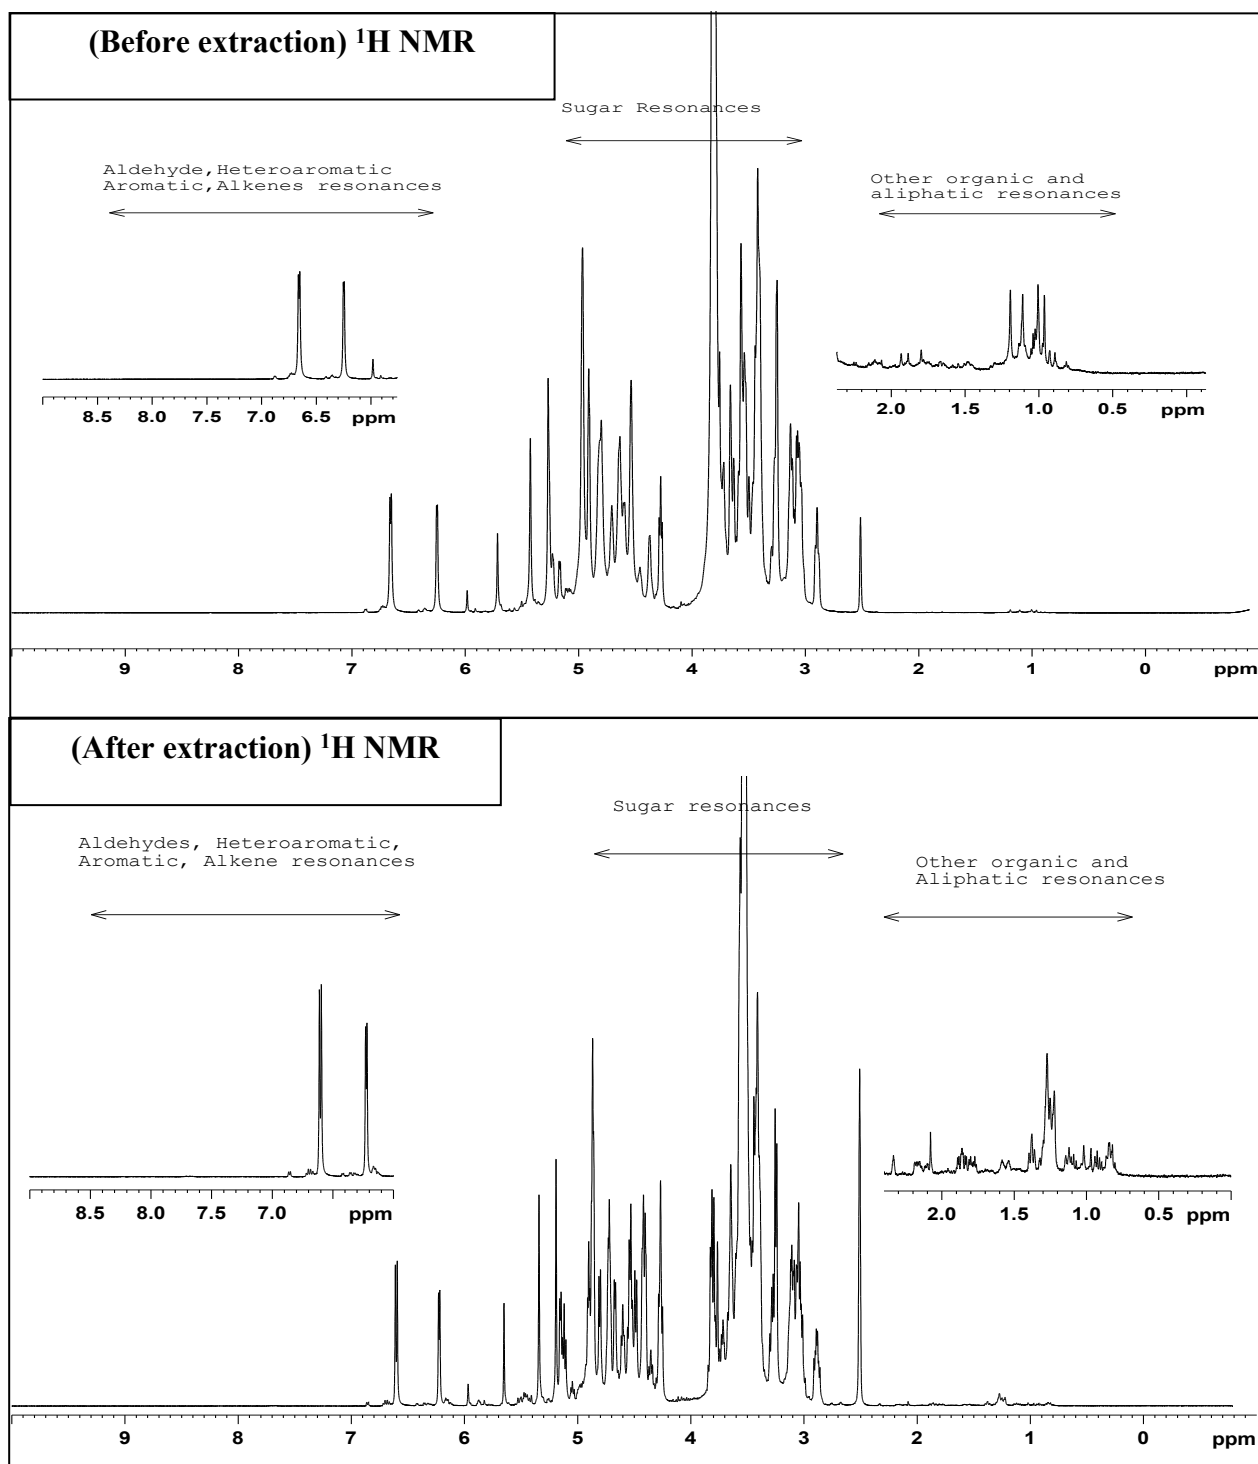

**Figure S6.**  $^1\text{H}$  NMR spectra of the new supersaturated solution used in the Diels-Alder reaction ( $\text{DMSO-d}^6$  solvent) at 500 MHz with respective peaks.

**Reference:**

1. C. Reichardt, *Green Chem.*, 2005, **7**, 339–351.
